# Supplementary material for: New tools for the analysis of refractive index measurements in liquid mixtures. Application to 2-diethylaminoethanol + water mixtures from 283.15 to 303.15 K
Source: Royal Society of Chemistry journal article supplement (doi:10.1039/b516167c), 2006-01-01
Supplement: b516167c.pdf [file b516167c.pdf]

# Supplementary Material (ESI) for New Journal of Chemistry

# This journal is (c) The Royal Society of Chemistry and

# The Centre National de la Recherche Scientifique, 2006

Table S1 Refractive index,  $n_t^D$ , and molar refractions,  $R$ , in  $\text{cm}^3 \text{mol}^{-1}$ , of the mixture water (1) + DEEA (2) at 283.15, 288.15, 293.15, 298.15 and 303.15 K.

| $x_2$   | 283.15 K |        | 288.15 K |        | 293.15 K |        |
|---------|----------|--------|----------|--------|----------|--------|
|         | $n_t^D$  | $R$    | $n_t^D$  | $R$    | $n_t^D$  | $R$    |
| 0.00000 | 1.3337   | 3.714  | 1.3334   | 3.714  | 1.3331   | 3.713  |
| 0.01005 | 1.3432   | 4.023  | 1.3421   | 4.016  | 1.3421   | 4.021  |
| 0.02016 | 1.3519   | 4.335  | 1.3507   | 4.329  | 1.3505   | 4.334  |
| 0.03000 | -        | -      | 1.3591   | 4.644  | 1.3579   | 4.639  |
| 0.04005 | 1.3666   | 4.951  | 1.3661   | 4.956  | 1.3650   | 4.954  |
| 0.05005 | 1.3727   | 5.258  | 1.3717   | 5.258  | 1.3710   | 5.263  |
| 0.06152 | -        | -      | 1.3779   | 5.611  | -        | -      |
| 0.07026 | 1.3836   | 5.882  | 1.3831   | 5.892  | 1.3815   | 5.888  |
| 0.08016 | 1.3882   | 6.186  | 1.3875   | 6.195  | 1.3862   | 6.196  |
| 0.09008 | 1.3920   | 6.486  | 1.3917   | 6.503  | 1.3902   | 6.503  |
| 0.10003 | 1.3957   | 6.790  | 1.3946   | 6.797  | 1.3937   | 6.807  |
| 0.11005 | 1.3989   | 7.094  | 1.3983   | 7.110  | 1.3969   | 7.114  |
| 0.12003 | 1.4019   | 7.397  | 1.4016   | 7.420  | 1.4000   | 7.422  |
| 0.13008 | 1.4048   | 7.705  | 1.4039   | 7.721  | 1.4028   | 7.733  |
| 0.14007 | 1.4074   | 8.010  | 1.4074   | 8.044  | 1.4054   | 8.041  |
| 0.14830 | 1.4096   | 8.267  | 1.4086   | 8.282  | 1.4072   | 8.293  |
| 0.16025 | 1.4120   | 8.628  | 1.4114   | 8.655  | 1.4100   | 8.664  |
| 0.17038 | 1.4142   | 8.942  | 1.4136   | 8.969  | 1.4121   | 8.978  |
| 0.18007 | -        | -      | 1.4152   | 9.264  | 1.4136   | 9.273  |
| 0.19047 | 1.4181   | 9.565  | -        | -      | -        | -      |
| 0.20024 | 1.4196   | 9.864  | -        | -      | 1.4172   | 9.903  |
| 0.21042 | 1.4211   | 10.177 | 1.4202   | 10.204 | 1.4186   | 10.216 |
| 0.22000 | 1.4225   | 10.474 | 1.4218   | 10.508 | 1.4199   | 10.511 |
| 0.23006 | 1.4238   | 10.786 | 1.4229   | 10.815 | 1.4213   | 10.827 |
| 0.24008 | 1.4253   | 11.102 | 1.4241   | 11.125 | 1.4228   | 11.145 |
| 0.25302 | 1.4266   | 11.499 | -        | -      | 1.4243   | 11.549 |
| 0.26736 | 1.4281   | 11.945 | 1.4271   | 11.976 | 1.4257   | 11.997 |
| 0.27008 | 1.4283   | 12.029 | 1.4274   | 12.061 | 1.4259   | 12.079 |
| 0.28008 | 1.4294   | 12.344 | -        | -      | 1.4269   | 12.394 |
| 0.29002 | 1.4303   | 12.653 | 1.4292   | 12.684 | 1.4278   | 12.704 |
| 0.30219 | -        | -      | 1.4304   | 13.070 | 1.4288   | 13.086 |
| 0.34998 | 1.4349   | 14.534 | 1.4331   | 14.548 | 1.4321   | 14.585 |
| 0.39992 | -        | -      | -        | -      | 1.4347   | 16.151 |
| 0.45066 | 1.4398   | 17.697 | 1.4378   | 17.711 | 1.4364   | 17.738 |
| 0.50007 | 1.4415   | 19.254 | -        | -      | 1.4379   | 19.290 |
| 0.55038 | -        | -      | 1.4405   | 20.842 | 1.4388   | 20.862 |
| 0.60012 | 1.4436   | 22.393 | 1.4415   | 22.414 | 1.4396   | 22.425 |
| 0.65141 | -        | -      | -        | -      | 1.4400   | 24.035 |
| 0.70005 | 1.4446   | 25.534 | 1.4424   | 25.553 | 1.4407   | 25.583 |
| 0.75077 | 1.4446   | 27.121 | 1.4422   | 27.134 | 1.4408   | 27.182 |
| 0.80013 | 1.4451   | 28.705 | -        | -      | 1.4411   | 28.762 |
| 0.85076 | 1.4448   | 30.290 | 1.4427   | 30.314 | 1.4410   | 30.362 |
| 0.90009 | 1.4452   | 31.862 | 1.4428   | 31.876 | 1.4411   | 31.922 |
| 0.95009 | 1.4452   | 33.408 | 1.4428   | 33.428 | 1.4412   | 33.482 |
| 1.00000 | 1.4463   | 34.957 | 1.4431   | 34.943 | 1.4412   | 34.989 |

# Supplementary Material (ESI) for New Journal of Chemistry  
 # This journal is (c) The Royal Society of Chemistry and  
 # The Centre National de la Recherche Scientifique, 2006

| $x_2$   | 298.15 K |        | 303.15 K |        |
|---------|----------|--------|----------|--------|
|         | $n_t^D$  | $R$    | $n_t^D$  | $R$    |
| 0.00000 | 1.3326   | 3.713  | 1.3321   | 3.713  |
| 0.01005 | 1.3413   | 4.018  | 1.3407   | 4.018  |
| 0.02016 | 1.3496   | 4.330  | 1.3491   | 4.333  |
| 0.03000 | 1.3570   | 4.636  | 1.3563   | 4.637  |
| 0.04005 | 1.3639   | 4.949  | 1.3631   | 4.952  |
| 0.05005 | 1.3698   | 5.257  | 1.3690   | 5.262  |
| 0.06152 | 1.3753   | 5.604  | 1.3745   | 5.609  |
| 0.07026 | 1.3803   | 5.883  | 1.3792   | 5.888  |
| 0.08016 | 1.3846   | 6.189  | 1.3837   | 6.198  |
| 0.09008 | 1.3890   | 6.501  | 1.3876   | 6.504  |
| 0.10003 | 1.3918   | 6.797  | 1.3907   | 6.805  |
| 0.11005 | 1.3957   | 7.114  | 1.3935   | 7.107  |
| 0.12003 | 1.3987   | 7.424  | 1.3967   | 7.420  |
| 0.13008 | 1.4020   | 7.742  | 1.3992   | 7.726  |
| 0.14007 | -        | -      | 1.4017   | 8.036  |
| 0.14830 | 1.4055   | 8.289  | 1.4038   | 8.295  |
| 0.16025 | 1.4083   | 8.663  | 1.4062   | 8.662  |
| 0.17038 | 1.4105   | 8.981  | 1.4081   | 8.976  |
| 0.18007 | 1.4119   | 9.273  | 1.4105   | 9.289  |
| 0.19047 | 1.4146   | 9.616  | -        | -      |
| 0.20024 | 1.4157   | 9.912  | 1.4136   | 9.913  |
| 0.21042 | -        | -      | 1.4146   | 10.222 |
| 0.22000 | 1.4181   | 10.518 | 1.4160   | 10.523 |
| 0.23006 | 1.4195   | 10.833 | 1.4176   | 10.843 |
| 0.24008 | 1.4208   | 11.149 | -        | -      |
| 0.25302 | -        | -      | 1.4204   | 11.568 |
| 0.26736 | 1.4240   | 12.010 | 1.4215   | 12.009 |
| 0.27008 | 1.4240   | 12.089 | 1.4217   | 12.092 |
| 0.28008 | 1.4256   | 12.420 | 1.4226   | 12.405 |
| 0.29002 | 1.4263   | 12.727 | 1.4235   | 12.718 |
| 0.30219 | 1.4270   | 13.102 | 1.4251   | 13.117 |
| 0.34998 | 1.4306   | 14.615 | 1.4281   | 14.613 |
| 0.39992 | 1.4327   | 16.169 | 1.4306   | 16.184 |
| 0.45066 | 1.4347   | 17.764 | 1.4322   | 17.764 |
| 0.50007 | 1.4361   | 19.312 | 1.4339   | 19.327 |
| 0.55038 | 1.4368   | 20.873 | 1.4346   | 20.884 |
| 0.60012 | 1.4376   | 22.428 | 1.4357   | 22.455 |
| 0.70005 | 1.4381   | 25.548 | 1.4362   | 25.575 |
| 0.75077 | 1.4387   | 27.171 | 1.4363   | 27.167 |
| 0.80013 | 1.4391   | 28.759 | 1.4368   | 28.753 |
| 0.85076 | 1.4390   | 30.364 | 1.4365   | 30.346 |
| 0.90009 | 1.4391   | 31.940 | 1.4365   | 31.916 |
| 0.95009 | 1.4391   | 33.513 | 1.4367   | 33.502 |
| 1.00000 | 1.4388   | 35.006 | 1.4369   | 35.052 |

# Supplementary Material (ESI) for New Journal of Chemistry  
# This journal is (c) The Royal Society of Chemistry and  
# The Centre National de la Recherche Scientifique, 2006

**Table S2** Least squares  $A_k$  ( $\text{cm}^3 \text{mol}^{-1}$ ) coefficients of eqn.(10), their standard deviations  $\sigma(A_i)$  ( $\text{cm}^3 \text{mol}^{-1}$ ), and the standard deviations of the fits,  $\sigma_{\text{fit}}$  ( $\text{cm}^3 \text{mol}^{-1}$ ), for the system water(1) + DEEA(2) from 283.15 to 303.15 K.

| $T/\text{K}$ | $A_0$   | $\sigma(A_0)$ | $A_1$   | $\sigma(A_1)$ | $A_2$   | $\sigma(A_2)$ | $A_3$  | $\sigma(A_3)$ | $A_4$  | $\sigma(A_4)$ | $\sigma_{\text{fit}}$ |
|--------------|---------|---------------|---------|---------------|---------|---------------|--------|---------------|--------|---------------|-----------------------|
| 283.15       | -0.3436 | 0.011         | 0.4010  | 0.029         | -0.6472 | 0.083         | 0.1140 | 0.069         | 1.3927 | 0.13          | 0.005                 |
| 288.15       | -0.2326 | 0.013         | 0.2534  | 0.043         | -0.4853 | 0.12          | 0.5211 | 0.10          | 1.4952 | 0.19          | 0.007                 |
| 293.15       | -0.2604 | 0.007         | 0.1623  | 0.019         | -0.2454 | 0.057         | 0.8192 | 0.048         | 1.3338 | 0.09          | 0.004                 |
| 298.15       | -0.2214 | 0.013         | -0.2036 | 0.039         | -0.7771 | 0.11          | 1.4854 | 0.095         | 2.0464 | 0.18          | 0.007                 |
| 303.15       | -0.2553 | 0.011         | -0.0700 | 0.036         | -0.9055 | 0.097         | 0.5951 | 0.086         | 1.3969 | 0.16          | 0.006                 |
